# Supplementary material
Source: PubMed Central journal article supplement (PMC4936571)
Supplement: supp_pp.16.00393_PP2016-00393R2_Supplemental_Figures_and_Tables.pdf [file supp_pp.16.00393_PP2016-00393R2_Supplemental_Figures_and_Tables.pdf]

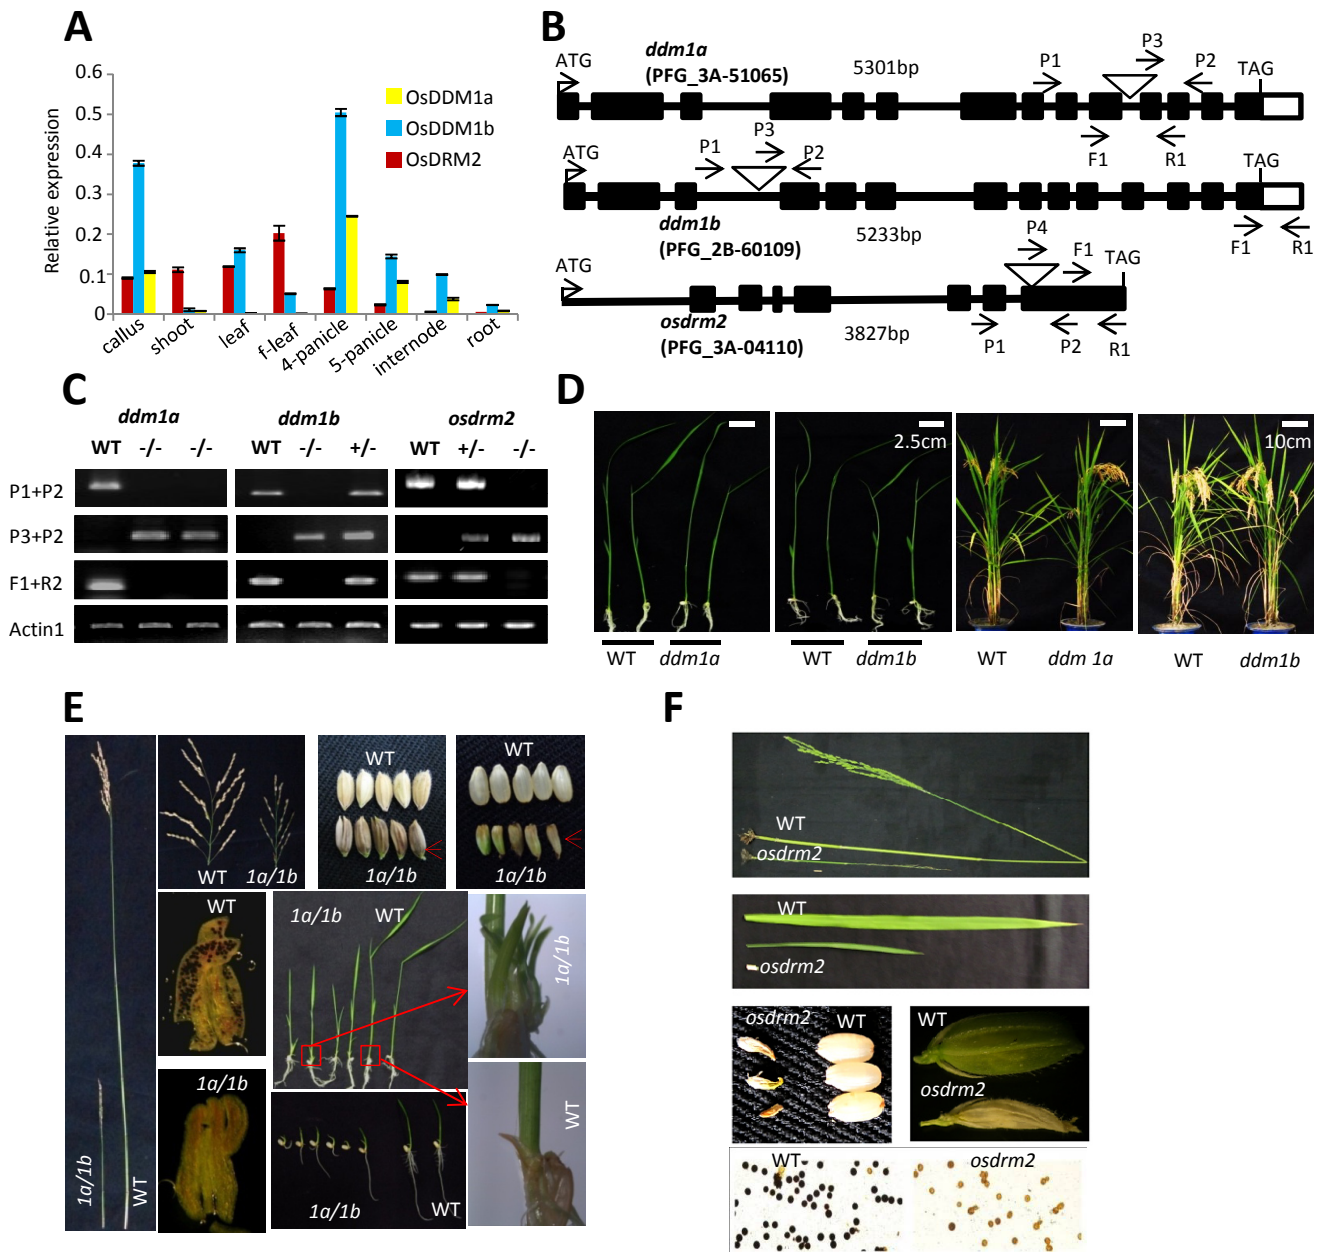

Figure S1. Related to Figure 1A. Characterization of expression and T-DNA insertion mutants of *OsDDM1a*, *OsDDM1b*, and *OsDRM2*.

**A.** Transcript levels of *OsDDM1a*, *OsDDM1b*, and *OsDRM2* relative to that of Actin 1 in difference organs, detected by qRT-PCR. Bars = means  $\pm$  SD from 3 repeats.

**B.** Diagrams of *OsDDM1a*, *OsDDM1b*, and *OsDRM2* genes. Open triangles indicate the T-DNA insertion sites. Primers used for genotyping are indicated by arrows.

**C.** Genotyping of T-DNA insertion plants.

**D.** *osddm1a* and *osddm1b* single mutants displayed no obvious phenotype at seedling and mature stages.

**E.** Phenotypes of *osddm1a/1b* double mutants in comparison with wild type. The double mutant is severely dwarfed at mature stage. The panicle is much smaller and no viable pollens were produced in the double mutant. Empty and dark colored seeds produced in the double mutant are indicated by arrows. Close-up shows ectopic tillers produced in the double mutant compared to wild type.

**F.** Phenotype of *osdrm2* mutant in comparison with wild type. The mutant has pleiotropic growth phenotypes at both vegetative and reproductive stages, including growth defects, abnormal panicle and spikelet morphology, and complete sterility.

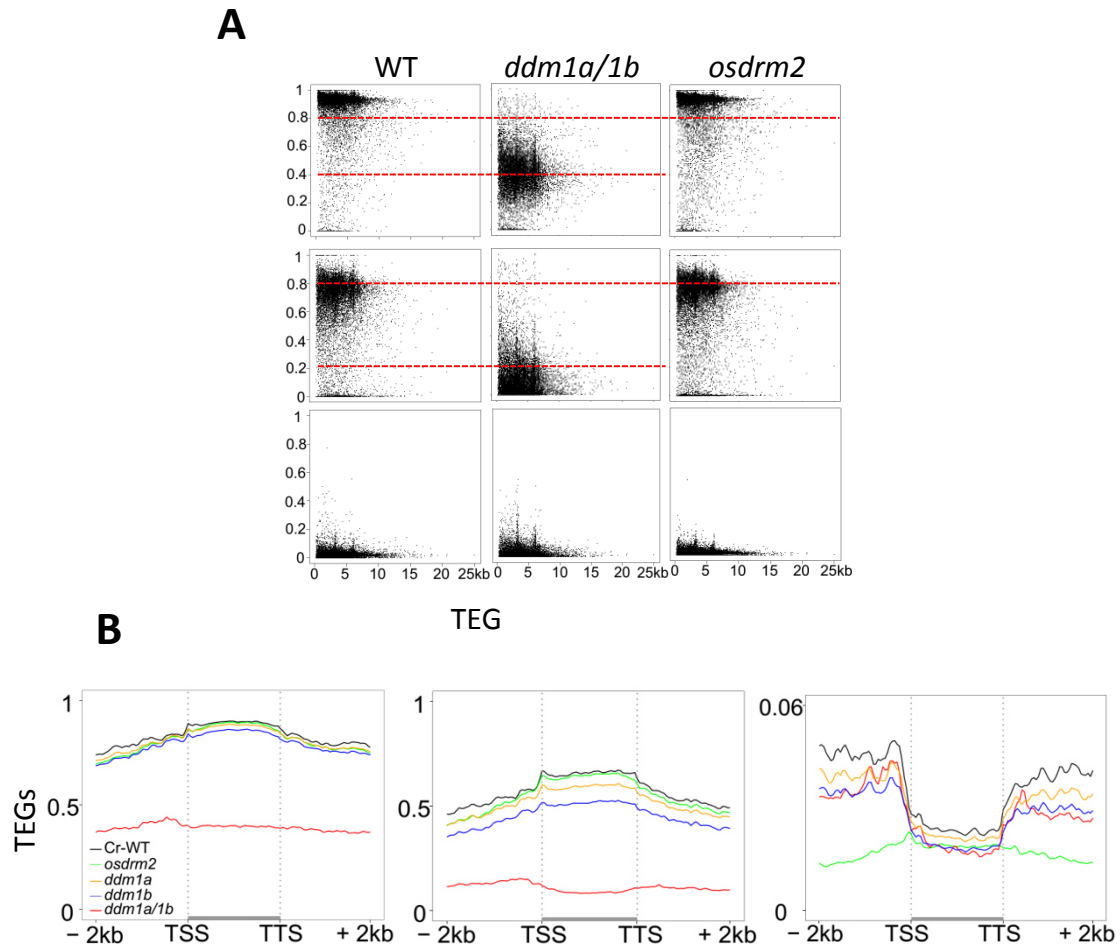

Figure S2. Related to Figure 2. Cytosine methylation average levels at all sequence contexts in TE-related genes (TEG).

**A.** Cytosine methylation average levels at all sequence contexts plotted against TEG size. Note that high levels of wild type CG methylation (>80) in TEG were reduced to about 40% in average in *osddm1a/1b*, and wild type CHG (80% in average) in TEG were reduced to low levels (below 20%) in *osddm1a/1b*, while remained unchanged in *osdrm2*.

**B.** Patterns and genome-wide average levels of cytosine methylation (CG, CHG, and CHH) of TEGs with their contiguous 2 kb upstream and downstream flanks in wild type and mutant rice plants.

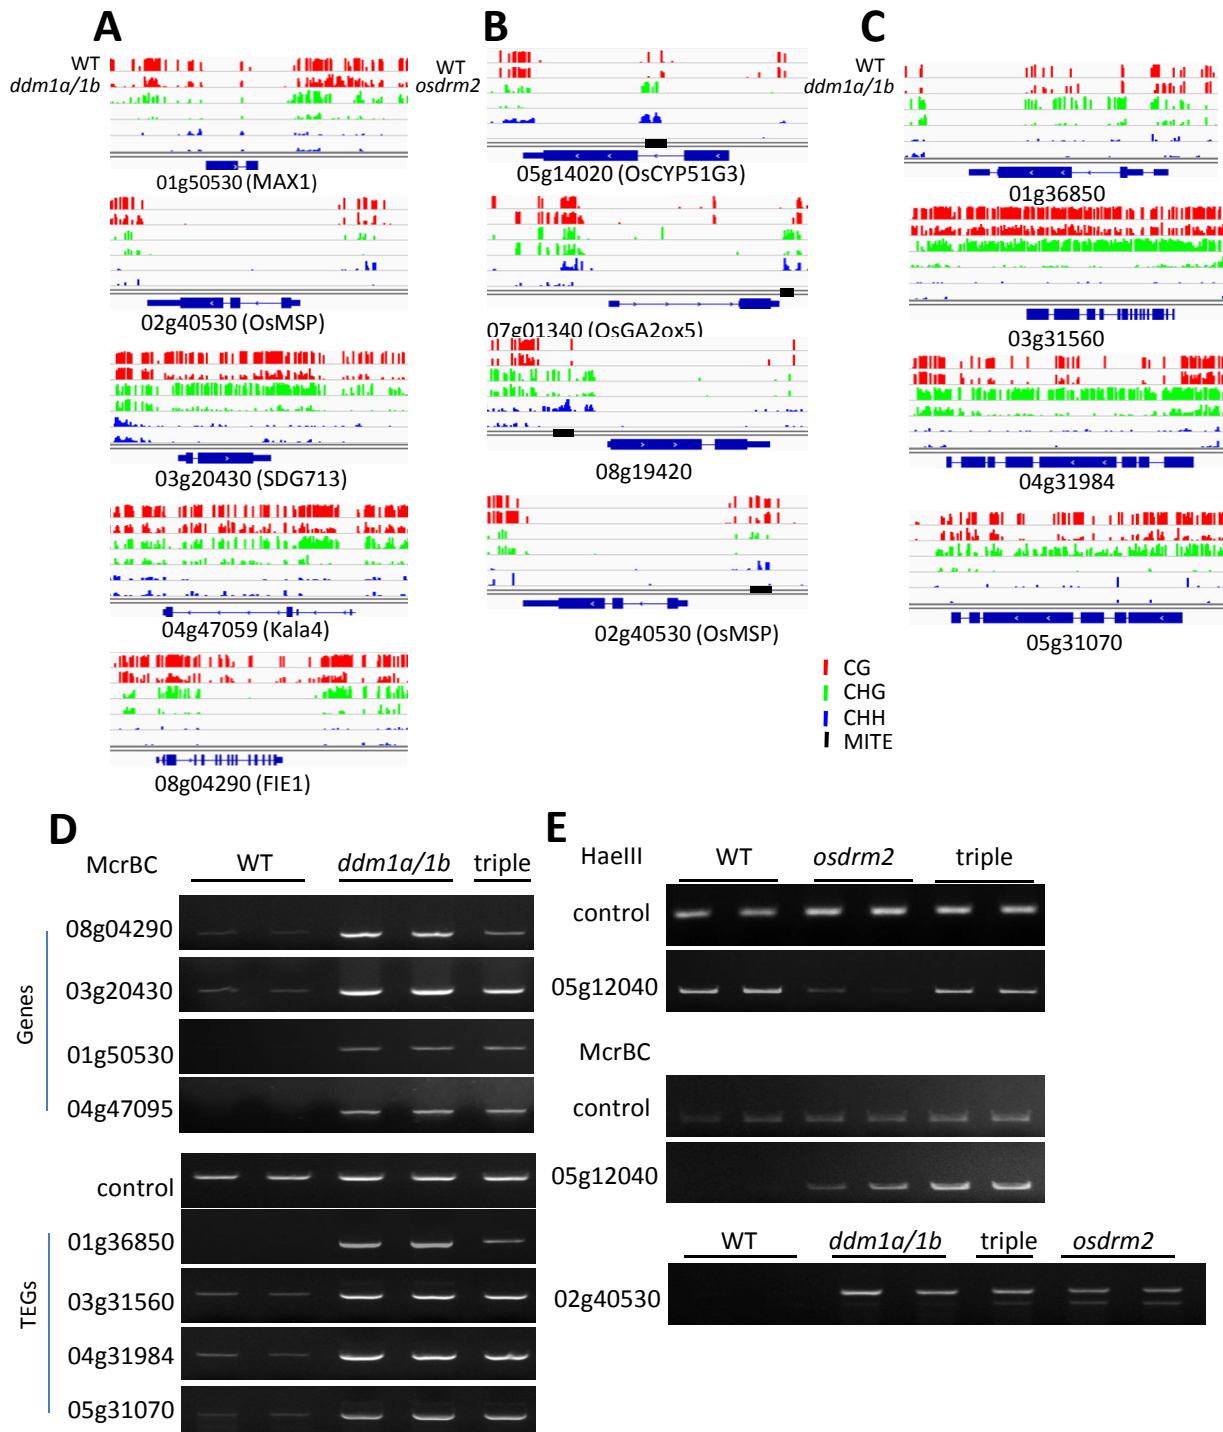

Figure S3. Related to Figure 2. Genome browser and validation of DNA methylation loss in the mutants.

**A.** Genome browser display of methylation of protein coding genes in *ddm1a/1b*.

**B.** Genome browser display of methylation of MITE-associated protein-coding genes in *osdrm2*.

**C.** Genome browser display of methylation of TE-related genes (TEGs) in *osddm1a/1b*.

**D.** McrBC-digestion and PCR tests of methylation of genes and TEGs (shown in A, C) in *osddm1a/1b* double and *osddm1a/1b osdrm2* triple mutants compared to wild type.

**E.** McrBC- or Hae III-digestion and PCR tests of methylation of genes (shown in B) in *osdrm2*, *osddm1a/1b*, and the triple mutants compared to wild type.

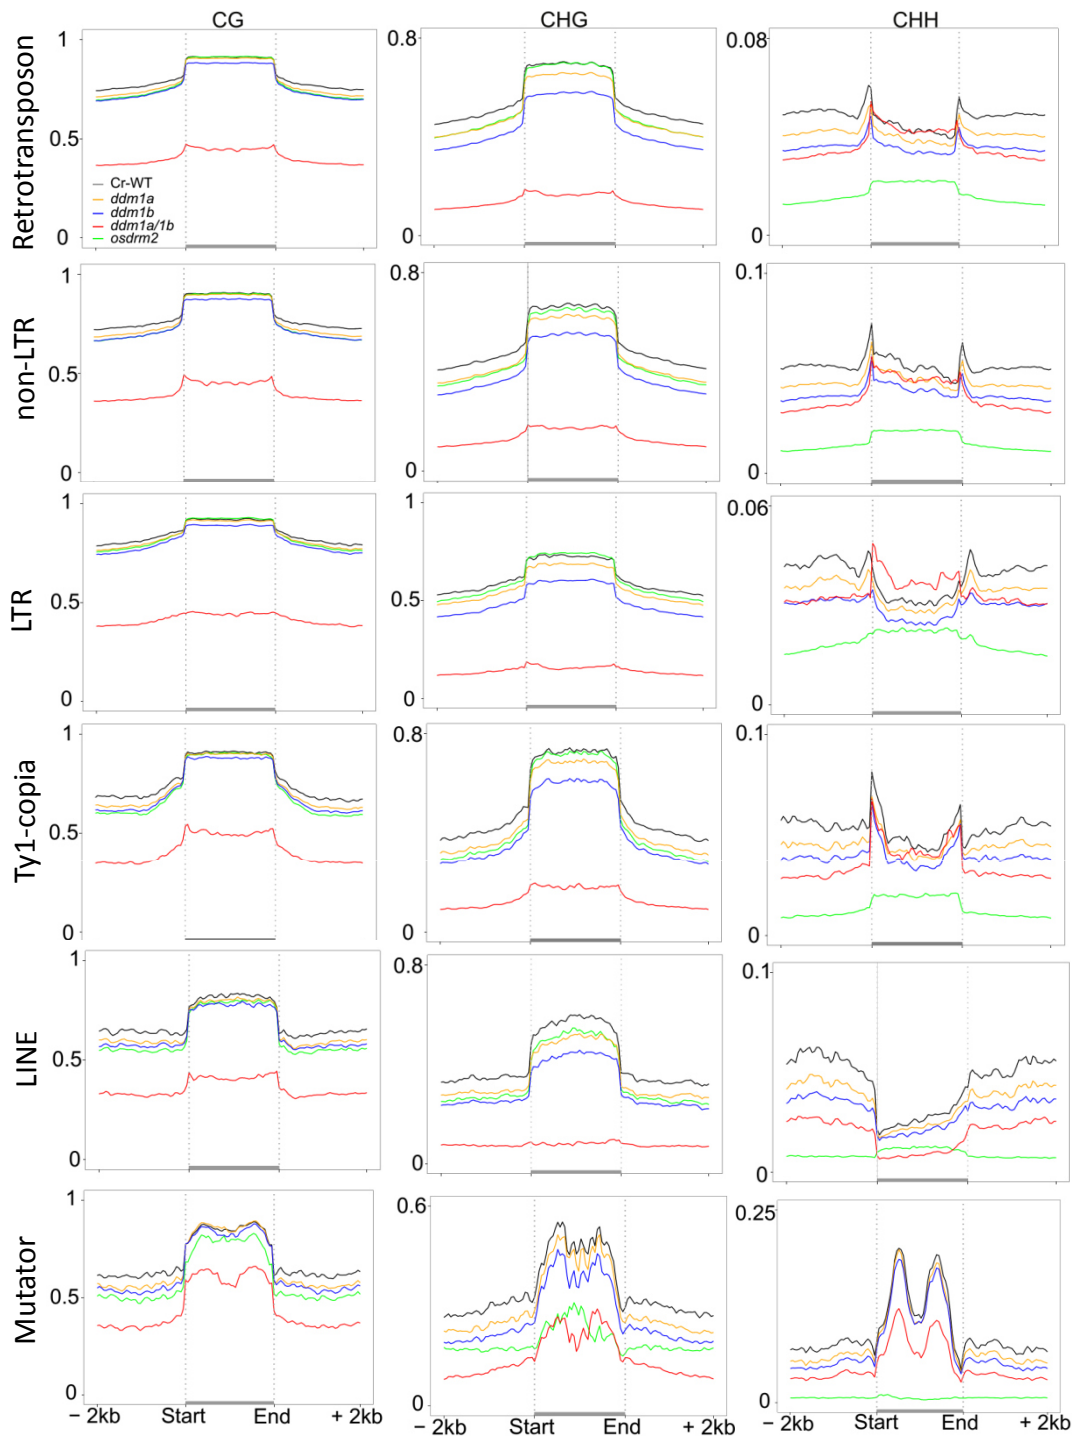

Figure S4. Related to Figure 3. Patterns of cytosine methylation (CG, CHG, and CHH) of additional TE and repeats in wild type and *osddm1a*, *osddm1b*, *osddm1a/1b*, and *osdrm2* mutants. TEs were aligned at the 5' and the 3' ends, and average methylation for all cytosines within each 100 bp interval is plotted.

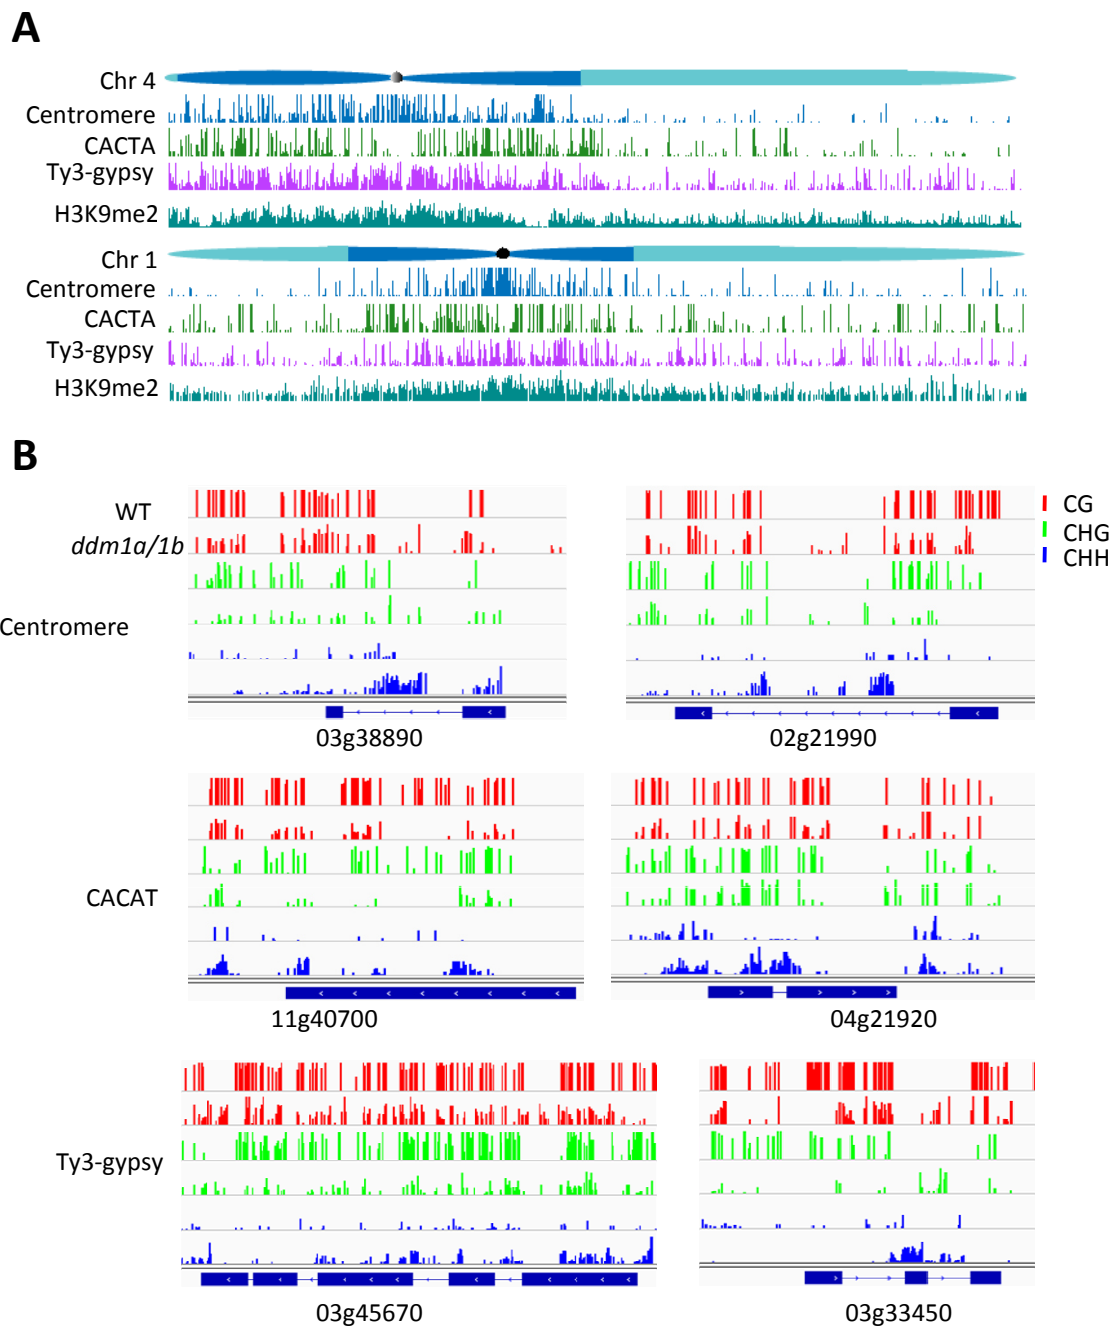

Figure S5. Related to Figure 3. Heterochromatin localization of hyper-CHH methylated TEs in *osddm1a/1b* plants.

**A.** Distribution of hyper-CHH methylated CACAT, Ty3-gypsy, and centromere repeats in chromosome 1 and chromosome 4.

**B.** Genome browser of methylation levels at CG, CHG and CHH sites of 2 CACAT, 2 Ty3-gypsy, and 2 centromere repeats in *osddm1a/1b* compared to wild type.

**A**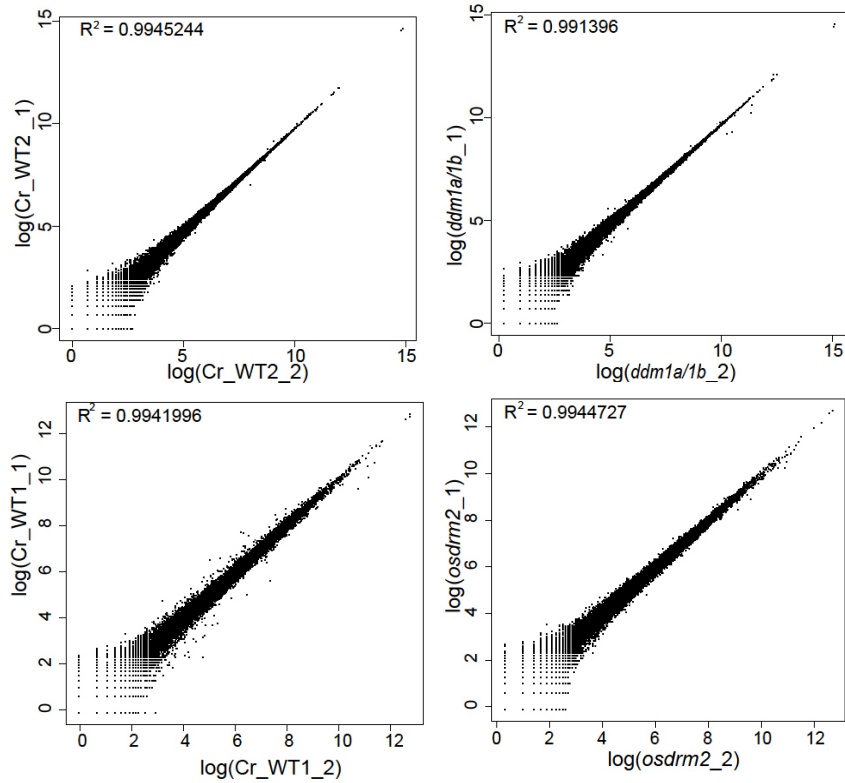**B**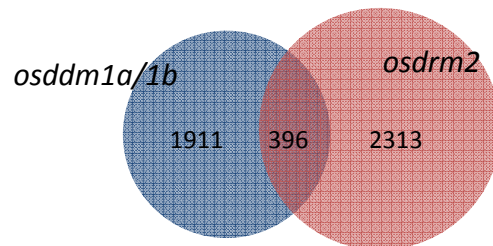

Figure S6. Related to Figure 6. A. Transcriptomic analysis.

- A.** Reproducibility of RNA-seq repeats of Cr\_WT, *osddm1a/1b*, and *osdrm2* seedling leaves.
- B.** Overlap of differentially expressed genes (> 2 fold changes) in *osddm1a/1b* and *osdrm2* mutants .

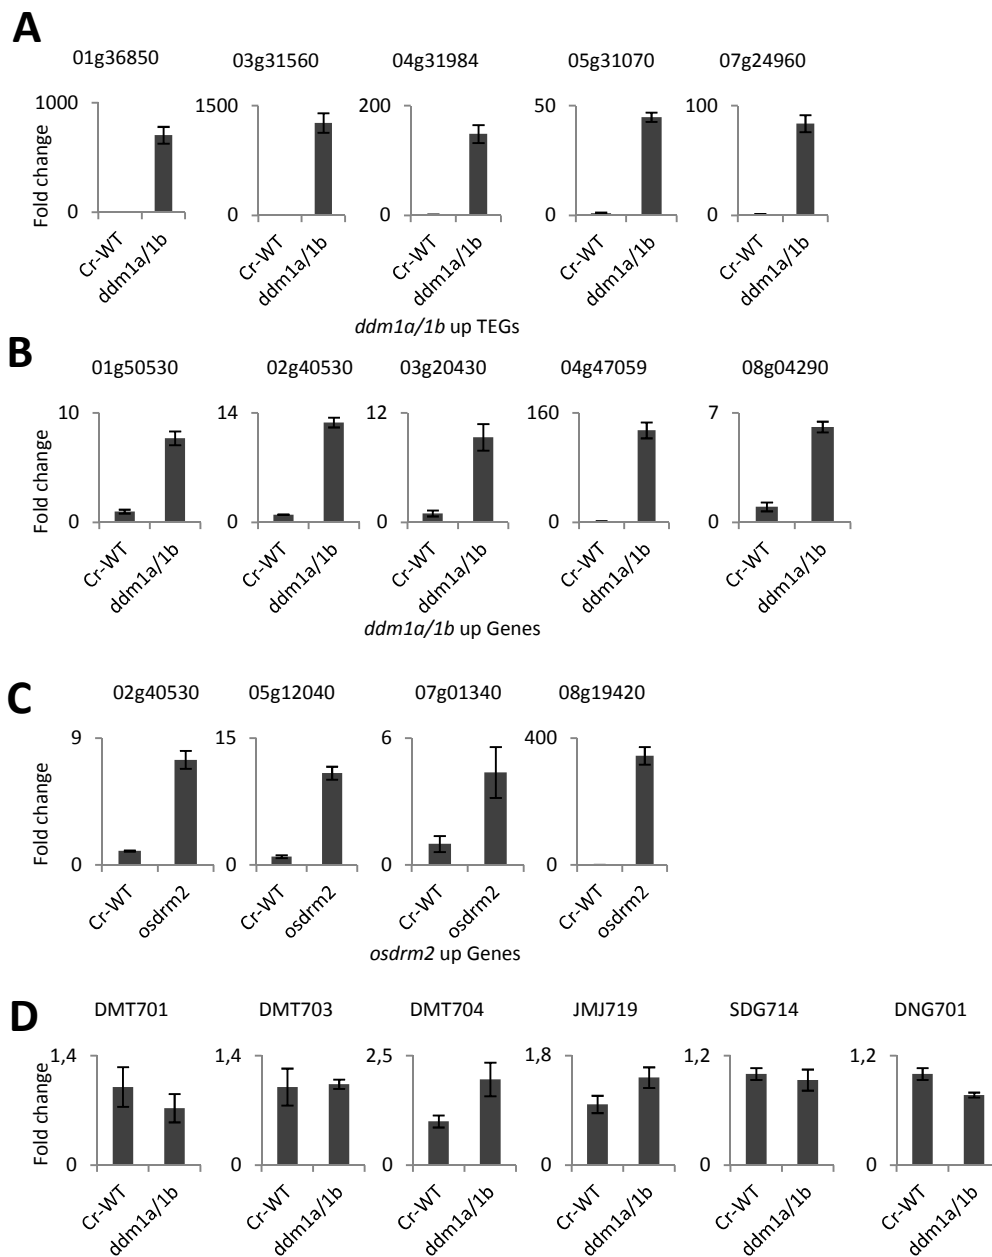

Figure S7. Related to Figure 6. Relative transcripts levels (*to Actin 1*) tested by qRT-PCR. **A.** Relative transcript levels of 5 TE-related genes shown in Fig S3 in *osddm1a/1b* compared Callus-regenerated wild type (Cr-WT). **B.** Relative transcript levels of 5 protein-coding genes shown in Fig S3 in *osddm1a/1b* compared wild type. **C.** Relative transcript levels of 4 protein-coding genes shown in Fig S3 in *osdrm2* compared wild type. **D.** Transcripts levels of H3K9me2 methyltransferase and demethylase genes in *osddm1a/1b* compared wild type. *DMT701* and *DMT704* (*OsCMT3*); *DMT703* (*OsCMT2*); *JMJ719* (*OsIBM1*); *SDG714* (*OsSUVH4*).

Table S1. Cytosine methylation levels in wild type and mutant rice leaves measured by mass spectrometry.

| Genotype        | n | 5-meC content (% of total cytosine) | Percentage of wild-type levels | Percentage decrease |
|-----------------|---|-------------------------------------|--------------------------------|---------------------|
| WT              | 2 | 18.80±0.51                          |                                |                     |
| <i>ddm1a</i>    | 3 | 18.23±0.52                          | 97                             | 3                   |
| <i>ddm1b</i>    | 3 | 16.65±0.68                          | 88.5                           | 11.5**              |
| <i>ddm1a/1b</i> | 3 | 8.73±0.68                           | 46.4                           | 53.6**              |

Table S2. Related to Figure 1B; BS-seq data of wild type and mutants.

| Sample              | Raw Reads | Raw Bases | Clean Reads | Clean Bases | unique mapping | unique reads | Bases | Coverage (X) | all mapping reads | all mapping | Bsmap    |
|---------------------|-----------|-----------|-------------|-------------|----------------|--------------|-------|--------------|-------------------|-------------|----------|
| Cr_WT_R1            | 50225388  | 6.28G     | 49777516    | 5.87G       | 0.606          | 30148787     | 3.59G | 19.1x        | 38885978          | 78.10%      | 39138323 |
| Cr_WT_R2            | 50225388  | 6.28G     | 49777516    | 5.87G       | 0.593          | 29457713     | 3.51G |              | 38177954          | 76.80%      | 38428905 |
| <i>osdrm2</i> _R1   | 51984762  | 6.50G     | 51598980    | 6.09G       | 0.685          | 35336806     | 4.20G | 22.4x        | 41945268          | 81.30%      | 42353999 |
| <i>osdrm2</i> _R2   | 51984762  | 6.50G     | 51598980    | 6.09G       | 0.675          | 34683659     | 4.13G |              | 41368623          | 80.60%      | 41748375 |
| <i>ddm1a/1b</i> _R1 | 49576575  | 6.20G     | 49086258    | 5.79G       | 65.20%         | 32018224     | 3.81G | 20.1x        | 38859020          | 79.20%      | 39191088 |
| <i>ddm1a/1b</i> _R2 | 49576575  | 6.20G     | 48887400    | 5.69G       | 63.30%         | 30880753     | 3.67G |              | 37685588          | 77.20%      | 38022832 |
| <i>ddm1a</i> _R1    | 54157402  | 6.77G     | 53515752    | 6.36G       | 67.90%         | 36341590     | 4.37G | 22.5x        | 44846996          | 83.80%      | 45231651 |
| <i>ddm1a</i> _R2    | 54157402  | 6.77G     | 53515752    | 6.36G       | 67.10%         | 35850415     | 4.30G |              | 44460623          | 83.30%      | 44818782 |
| <i>ddm1b</i> _R1    | 52796143  | 6.60G     | 52216457    | 6.18G       | 67.10%         | 35042446     | 4.18G | 22.2x        | 42172955          | 80.80%      | 42581410 |
| <i>ddm1b</i> _R2    | 52796143  | 6.60G     | 52216457    | 6.18G       | 65.90%         | 34277335     | 4.08G |              | 41503003          | 79.80%      | 41904424 |

Table S3. Related to Figure 1B; H3K27me3 and H3K9me2 ChIP-seq data

|               | Clean paired reads | aligned concordantly exactly 1 time | aligned concordantly >1 times | Fail to align  |
|---------------|--------------------|-------------------------------------|-------------------------------|----------------|
| Anti-H3K27me3 | 26194106           | 19755934 (75.42%)                   | 5857015 (22.36%)              | 581157 (2.22%) |
| Anti-H3K9me2  | 31124057           | 10974036 (35.26%)                   | 19609049 (63.00%)             | 540972 (1.74%) |



Table S4. Related to Figure 6; RNA-seq data (two repeats per sample).

| Sample                | raw reads | Bases | read count | clean data | pair mapping rate |
|-----------------------|-----------|-------|------------|------------|-------------------|
| Cr_WT1_1_R1           | 37875666  | 1.93G | 34674908   | 1.62G      | 96.40%            |
| Cr_WT1_1_R2           | 37875666  | 1.93G | 34674908   | 1.61G      |                   |
| Cr_WT1_2_R1           | 38232336  | 1.95G | 31678952   | 1.48G      | 96.30%            |
| Cr_WT1_2_R2           | 38232336  | 1.95G | 31678952   | 1.47G      |                   |
| <i>osdrm2</i> _1_R1   | 33093494  | 1.69G | 31219031   | 1.46G      | 95.50%            |
| <i>osdrm2</i> _1_R2   | 33093494  | 1.69G | 31219031   | 1.45G      |                   |
| <i>osdrm2</i> _2_R1   | 33295195  | 1.70G | 21412846   | 1.00G      | 95.10%            |
| <i>osdrm2</i> _2_R2   | 33295195  | 1.70G | 21412846   | 0.99G      |                   |
| Cr_WT2_1_R1           | 26823185  | 4.05G | 26168322   | 3.52G      | 92.30%            |
| Cr_WT2_1_R2           | 26823185  | 4.05G | 26168322   | 3.30G      |                   |
| Cr_WT2_2_R1           | 33143704  | 5.00G | 31678952   | 4.46G      | 92.00%            |
| Cr_WT2_2_R2           | 33143704  | 5.00G | 31678952   | 4.18G      |                   |
| <i>ddm1a/1b</i> _1_R1 | 35700950  | 5.39G | 34976763   | 4.78G      | 91.10%            |
| <i>ddm1a/1b</i> _1_R2 | 35700950  | 5.39G | 34976763   | 4.49G      |                   |
| <i>ddm1a/1b</i> _2_R1 | 27632632  | 4.17G | 27000421   | 3.70G      | 91.00%            |
| <i>ddm1a/1b</i> _2_R2 | 27632632  | 4.17G | 27000421   | 3.46G      |                   |
| <i>ddm1a/1b</i> _1_R1 | 35700950  | 5.39G | 34976763   | 4.78G      | 91.10%            |
| <i>ddm1a/1b</i> _1_R2 | 35700950  | 5.39G | 34976763   | 4.49G      |                   |
| <i>ddm1a/1b</i> _2_R1 | 27632632  | 4.17G | 27000421   | 3.70G      | 91.00%            |
| <i>ddm1a/1b</i> _2_R2 | 27632632  | 4.17G | 27000421   | 3.46G      |                   |

Table S5. Related to Figure 5. Numbers of hypo or hyper DMC, DMR and DMGs in CG, CHG, and CHH contexts in the mutants.

| DMCs            | CG     |       | CHG    |       | CHH     |       |
|-----------------|--------|-------|--------|-------|---------|-------|
|                 | Hypo   | Hyper | Hypo   | Hyper | Hypo    | Hyper |
| <i>osdrm2</i>   | 30570  | 12335 | 227058 | 13485 | 1597161 | 19924 |
| <i>ddm1a/1b</i> | 263798 | 9161  | 765968 | 4436  | 313235  | 65719 |
| <i>ddm1a</i>    | 12734  | 16710 | 21892  | 8006  | 51391   | 42193 |
| <i>ddm1b</i>    | 35929  | 47668 | 72650  | 11042 | 74172   | 40674 |

  

| DMRs            | CG    |       | CHG    |       | CHH   |       |
|-----------------|-------|-------|--------|-------|-------|-------|
|                 | Hypo  | Hyper | Hypo   | Hyper | Hypo  | Hyper |
| <i>osdrm2</i>   | 1169  | 315   | 9431   | 456   | 90851 | 492   |
| <i>ddm1a/1b</i> | 11314 | 120   | 120229 | 80    | 48245 | 8388  |
| <i>ddm1a</i>    | 110   | 136   | 301    | 101   | 11490 | 808   |
| <i>ddm1b</i>    | 671   | 567   | 1177   | 292   | 23155 | 1112  |

  

| DMGs   | <i>osdrm2</i> |           |           | <i>ddm1a/1b</i> |           |           |
|--------|---------------|-----------|-----------|-----------------|-----------|-----------|
|        | CG hypo       | CHG hypo  | CHH hypo  | CG hypo         | CHG hypo  | CHH hypo  |
| non-TE | 61            | 633       | 11777     | 229             | 2569      | 6034      |
| TE     | 5             | 60        | 1048      | 525             | 8674      | 483       |
|        | CG hyper      | CHG hyper | CHH hyper | CG hyper        | CHG hyper | CHH hyper |
| non-TE | 23            | 36        | 48        | 5               | 6         | 154       |
| TE     | 4             | 27        | 22        | 0               | 0         | 414       |
